# Supplementary material
Source: MDPI journal article supplement (https://www.mdpi.com/2077-1312/11/7/1418)
Supplement: s1 [file s1]

**Table S1.** The SWRL rules for calculating CO<sub>2</sub> emission.

|        |                                                                                                                                                                                                                                                                                                                                                                                                                                                 |                                                             |
|--------|-------------------------------------------------------------------------------------------------------------------------------------------------------------------------------------------------------------------------------------------------------------------------------------------------------------------------------------------------------------------------------------------------------------------------------------------------|-------------------------------------------------------------|
| Rule 1 | Calculating total CO <sub>2</sub> emission of SCS:                                                                                                                                                                                                                                                                                                                                                                                              | $CO_2 = CO_{2-m} + CO_{2-p} + CO_{2-t} - CO_{2-a}$          |
|        | Stabilized_Soil(?SS)^CO <sub>2</sub> _Cement(?SS,?CO <sub>2</sub> C)^CO <sub>2</sub> _Stabilizer(?SS, ?CO <sub>2</sub> S)^CO <sub>2</sub> _Transportation(?SS,?CO <sub>2</sub> T)^CO <sub>2</sub> _Avoided_Landfilling(?SS,?CO <sub>2</sub> a)^swrlb:add(?x, ?CO <sub>2</sub> C, ?CO <sub>2</sub> S, ?CO <sub>2</sub> T)^swrlb:subtract(?total_CO <sub>2</sub> , ?x,?CO <sub>2</sub> a) -> Total_CO <sub>2</sub> (?SS, ?total_CO <sub>2</sub> ) |                                                             |
| Rule 2 | Calculating CO <sub>2</sub> emission of raw material production:                                                                                                                                                                                                                                                                                                                                                                                | $CO_{2-m} = W_c \times CO_{2-mf}$                           |
|        | Soil(?SS)^Weight_Cement(?SS,?WC)^swrlb:multiply(?co <sub>2</sub> _Cement,?WC,735)-> CO <sub>2</sub> _Cement(?SS,?co <sub>2</sub> _Cement)                                                                                                                                                                                                                                                                                                       |                                                             |
| Rule 3 | Calculating CO <sub>2</sub> emission of stabilizer preparation :                                                                                                                                                                                                                                                                                                                                                                                | $CO_{2-p} = E_g \times CO_{2-pf} - W_s \times CO_{2uptake}$ |
|        | Stabilized_Soil(?SS)^CO <sub>2</sub> _Stabilizer(?SS,?CO <sub>2</sub> S)^Electricity_Grinding(?SS,?EG)^CO <sub>2</sub> _uptake(?SS,?co <sub>2</sub> _uptake)^Weight_Cement(?SS,?WS)^swrlb:multiply(?x,?EG,0.7769)^swrlb:multiply(?y,?WS,?co <sub>2</sub> _uptake)^swrlb:subtract(?CO <sub>2</sub> S,?x,?y)-> CO <sub>2</sub> _Stabilizer(?SS,?CO <sub>2</sub> S)                                                                                |                                                             |
| Rule 4 | Calculating CO <sub>2</sub> emission of transportation:                                                                                                                                                                                                                                                                                                                                                                                         | $CO_{2-t} = \sum_{i=1}^n W_i \times D_i \times CO_{2-ti}$   |
|        | Stabilized_Soil(?SS)^CO <sub>2</sub> _Transportation(?SS,?CO <sub>2</sub> T)^Weight_Steel_Slag(?SS,?WS)^Weight_Cement(?SS,?WC)^Transportation_Distance(?SS,?TD)^swrlb:multiply(?x,?WC,?TD,0.162)^swrlb:multiply(?y,?WS,?TD,0.162)^swrlb:add(?CO <sub>2</sub> T,?x,?y)->CO <sub>2</sub> _Transportation(?SS,?CO <sub>2</sub> T)                                                                                                                  |                                                             |

**Table S2.** The SWRL rules for calculating cost.

|        |                                                                                                                                                                                                                                                       |                                                         |
|--------|-------------------------------------------------------------------------------------------------------------------------------------------------------------------------------------------------------------------------------------------------------|---------------------------------------------------------|
| Rule 1 | Calculating the total cost of SCS:                                                                                                                                                                                                                    | $Cost = Cost_m + Cost_p + Cost_t - Cost_a$              |
|        | Stabilized_Soil(?SS)^Cost_Material(?SS,?CM)^Cost_Stabilizer(?SS,?CS)^Cost_Transportation(?SS,?CT)^Cost_Avoided_Landfilling(?SS,?CA)^swrlb:add(?x,?CC,?CS,?CT)^swrlb:subtract(?total_Cost,?x,?CA)->Total_Cost(?SS, ?total_Cost)                        |                                                         |
| Rule 2 | Calculating the cost of raw material:                                                                                                                                                                                                                 | $Cost_m = \sum_{i=1}^n W_i \times Cost_{mi}$            |
|        | Stabilized_Soil(?SS)^Weight_Cement(?SS,?WC)^Weight_Steel_Slag(?SS,?WS)^swrlb:multiply(?x,?WC,67.8)^swrlb:multiply(?y,?WS,10.9)^swrlb:add(?CM,?x,?y)->Cost_Material(?SS,? CM)                                                                          |                                                         |
| Rule 3 | Calculating the cost of stabilizer preparation:                                                                                                                                                                                                       | $Cost_p = E_g \times Cost_{pf}$                         |
|        | Stabilized_Soil(?SS)^Electricity_Grinding(?SS,?EG)^swrlb:multiply(?x,?EG,0.145)^swrlb:multiply(? CS,?EC,?0)->Cost_Stabilizer (?SS,? CS)                                                                                                               |                                                         |
| Rule 4 | Calculating the cost of transportation:                                                                                                                                                                                                               | $Cost_t = \sum_{i=1}^n W_i \times D_i \times Cost_{ti}$ |
|        | Stabilized_Soil(?SS)^Weight_Steel_Slag(?SS,?WS)^Weight_Cement(?SS,?WC)^Transportation_Distance(?SS,?TD)^Cost_Transportation(?SS,?CT)^swrlb:multiply(?x,?WS,?TD,0.14)^swrlb:multiply(?y,?WC,0.14)^swrlb:add(?CT,?x,?y)-> Cost_Transportation(?SS,? CT) |                                                         |

**Table S3.** The SWRL rules for calculating the sustainability index.

|                                                                    |                                                                                                                                                                                                                      |
|--------------------------------------------------------------------|----------------------------------------------------------------------------------------------------------------------------------------------------------------------------------------------------------------------|
| $SUI_{environment} = \frac{CO_2 \times 2070.2}{UCS \times 212.35}$ |                                                                                                                                                                                                                      |
| Rule 1                                                             | Calculating $SUI_{environment}$ of SCS:<br>Stabilized_Soil(?SS)^Total_CO2(?SS,?TCO2)^UCS(?SS,?UCS)^swrlb:multiply(?x,?TCO2,2070.2)^swrlb:multiply(?y,?UCS,212.35)^swrlb:divide(?sui_En,?x, ?y)-> SUI_En(?SS,?sui_En) |
| $SUI_{economic} = \frac{Cost \times 2070.2}{UCS \times 20.15}$     |                                                                                                                                                                                                                      |
| Rule 2                                                             | Calculating $SUI_{economic}$ of SCS:<br>Stabilized_Soil(?SS)^Total_Cost(?SS,?TC)^UCS(?SS,?UCS)^swrlb:multiply(?x, ?TC,2070.2)^swrlb:multiply(?y,?UCS,20.15)^swrlb:divide(?sui_Ec,?x, ?y)-> SUI_Ec(?SS,?sui_Ec)       |

**Table S4.** The SQWRL rules for selecting all the information.

|       |                                                                                                                                                                                |
|-------|--------------------------------------------------------------------------------------------------------------------------------------------------------------------------------|
| SQWRL | Stabilized_Soil(?SS)^Total_CO2(?SS,?total_co2)^Total_Cost(?SS, ?total_cost)^SUI_En(?SS,?sui_en)^SUI_Ec(?SS,?sui_ec)->sqwrl:select(?SS,?total_co2,?total_cost,?sui_en, ?sui_ec) |
|-------|--------------------------------------------------------------------------------------------------------------------------------------------------------------------------------|

**Table S5.** The SQWRL rules with sustainability index less than 1.

|       |                                                                                                                                                                                                                                      |
|-------|--------------------------------------------------------------------------------------------------------------------------------------------------------------------------------------------------------------------------------------|
| SQWRL | Stabilized_Soil(?SS)^Total_CO2(?SS,?total_co2)^Total_Cost(?SS, ?total_cost)^SUI_En(?SS,?sui_en)^SUI_Ec(?SS,?sui_ec)^swrlb:lessThan(?sui_en,1)^swrlb:LessThan(?sui_ec,1)->sqwrl:select(?SS, ?total_co2,?total_cost, ?sui_en, ?sui_ec) |
|-------|--------------------------------------------------------------------------------------------------------------------------------------------------------------------------------------------------------------------------------------|

**Table S6.** The SWRL rules for calculating  $D_{smax}$ .

|                                                                       |                                                                                                                                                                                                                                                                                         |
|-----------------------------------------------------------------------|-----------------------------------------------------------------------------------------------------------------------------------------------------------------------------------------------------------------------------------------------------------------------------------------|
| $D_{smax-GWP} = \frac{212.66 - (CO_2 - CO_{2-ts})}{W_s \times 0.162}$ |                                                                                                                                                                                                                                                                                         |
| Rule 1                                                                | Stabilized_Soil(?SS)^Total_CO2(?SS,?TCO2)^CO2_Transportation_Steel_Slag(?SS,?CO2TS)^Weight_Steel_Slag(?SS,?WS)^Distance_Steel_Slag(?SS,?DS)->swrlb:subtract(?x,?TCO2,?CO2TS)^swrlb:subtract(?y,212.66,?x)^multiply(?z,?WS,0.162)^swrlb:divide(?DS,?y,?z)->Distance_Steel_Slag (?SS,?DS) |
| $D_{smax-Cost} = \frac{18.85 - (Cost - CO_{2-tc})}{W_s \times 0.14}$  |                                                                                                                                                                                                                                                                                         |
| Rule2                                                                 | Stabilized_Soil(?SS)^Total_Cost(?SS,?TC)^Cost_Transportation_Steel_Slag(?SS,?CTS)^Weight_Steel_Slag(?SS,?WS)^Distance_Steel_Slag(?SS,?DS)->swrlb:subtract(?x,?TC,CTS)^swrlb:subtract(?y,18.85,?x)^multiply(?z,?WS,0.14)^swrlb:divide(?DS,?y,?z)->Distance_Steel_Slag (?SS,?DS)          |
